# Supplementary material for: Using multiple correspondence analysis to determine recommended professional profiles for Smart Cities projects
Source: PeerJ journal article supplement (doi:10.7717/peerj-cs.3466), 2026-02-20
Supplement: SMACITE_DescriptiveAnalysis_R_Techn.xlsx [file SMACITE_DescriptiveAnalysis_R_Techn.xlsx]

## Sheet: Content
Nationality	Gender	Experience	Familiarity	Stakeholder	PM-Civil	Cloud	Security	Data	IoT	ET	B/M	SS	GS
Southern Europe	Male	Less or equal than 20 years	Highly qualified and professional experience in the area	Public sector and authorities (client side)	Essential	Relevant + Useful	Relevant + Useful	Relevant + Useful	Relevant + Useful	Essential	Relevant + Useful	Essential	Relevant + Useful
Southern Europe	Female	Less or equal than 20 years	Highly qualified and professional experience in the area	Public sector and authorities (client side)	Relevant + Useful	Relevant + Useful	Relevant + Useful	Relevant + Useful	Relevant + Useful	Essential	Essential	Relevant + Useful	Relevant + Useful
Southern Europe	Female	Less or equal than 20 years	Application of concepts out of professional practice	Public sector and authorities (client side)	Essential	Relevant + Useful	Essential	Essential	Relevant + Useful	Relevant + Useful	Essential	Essential	Essential
Southern Europe	Male	Less or equal than 20 years	Highly qualified and professional experience in the area	Business sector and providers (supply side)	Relevant + Useful	Relevant + Useful	Relevant + Useful	Relevant + Useful	Relevant + Useful	Relevant + Useful	Relevant + Useful	Relevant + Useful	Relevant + Useful
Southern Europe	Male	More than 20	Application of concepts out of professional practice	Public sector and authorities (client side)	Essential	Relevant + Useful	Relevant + Useful	Relevant + Useful	Relevant + Useful	Relevant + Useful	Essential	Relevant + Useful	Essential
Southern Europe	Female	Less or equal than 20 years	Basic knowledge / None knowledge	Business sector and providers (supply side)	Relevant + Useful	Essential	Relevant + Useful	Essential	Essential	Essential	Relevant + Useful	Relevant + Useful	Relevant + Useful
Southern Europe	Female	Less or equal than 20 years	Basic knowledge / None knowledge	Public sector and authorities (client side)	Essential	Essential	Essential	Relevant + Useful	Essential	Essential	Essential	Essential	Essential
Southern Europe	Male	Less or equal than 20 years	Highly qualified and professional experience in the area	Civil society (user side)	Relevant + Useful	Relevant + Useful	Relevant + Useful	Relevant + Useful	Essential	Essential	Relevant + Useful	Relevant + Useful	Relevant + Useful
Central, Eastern, Western, Northern Europe	Male	More than 20	Basic knowledge / None knowledge	Business sector and providers (supply side)	Relevant + Useful	Relevant + Useful	Relevant + Useful	Relevant + Useful	Relevant + Useful	Relevant + Useful	Relevant + Useful	Relevant + Useful	Relevant + Useful
Central, Eastern, Western, Northern Europe	Male	More than 20	Highly qualified and professional experience in the area	Business sector and providers (supply side)	Relevant + Useful	Relevant + Useful	Essential	Essential	Relevant + Useful	Essential	Relevant + Useful	Relevant + Useful	Relevant + Useful
Southern Europe	Male	More than 20	Application of concepts out of professional practice	Business sector and providers (supply side)	Relevant + Useful	Relevant + Useful	Relevant + Useful	Relevant + Useful	Essential	Essential	Relevant + Useful	Relevant + Useful	Relevant + Useful
Central, Eastern, Western, Northern Europe	Male	More than 20	Application of concepts out of professional practice	Civil society (user side)	Essential	Relevant + Useful	Essential	Relevant + Useful	Relevant + Useful	Relevant + Useful	Relevant + Useful	Relevant + Useful	Relevant + Useful
Central, Eastern, Western, Northern Europe	Male	More than 20	Highly qualified and professional experience in the area	Business sector and providers (supply side)	Relevant + Useful	Relevant + Useful	Essential	Essential	Essential	Relevant + Useful	Essential	Essential	Relevant + Useful
Southern Europe	Male	More than 20	Highly qualified and professional experience in the area	Public sector and authorities (client side)	Essential	Essential	Relevant + Useful	Relevant + Useful	Essential	Essential	Relevant + Useful	Relevant + Useful	Relevant + Useful
Southern Europe	Female	More than 20	Highly qualified and professional experience in the area	Business sector and providers (supply side)	Essential	Essential	Relevant + Useful	Relevant + Useful	Relevant + Useful	Essential	Relevant + Useful	Relevant + Useful	Relevant + Useful
Central, Eastern, Western, Northern Europe	Male	Less or equal than 20 years	Application of concepts out of professional practice	Business sector and providers (supply side)	Relevant + Useful	Essential	Relevant + Useful	Relevant + Useful	Essential	Essential	Relevant + Useful	Relevant + Useful	Relevant + Useful
Central, Eastern, Western, Northern Europe	Male	More than 20	Application of concepts out of professional practice	Business sector and providers (supply side)	Relevant + Useful	Essential	Essential	Relevant + Useful	Essential	Essential	Relevant + Useful	Relevant + Useful	Relevant + Useful
Central, Eastern, Western, Northern Europe	Male	More than 20	Application of concepts out of professional practice	Business sector and providers (supply side)	Essential	Relevant + Useful	Essential	Relevant + Useful	Relevant + Useful	Relevant + Useful	Relevant + Useful	Relevant + Useful	Relevant + Useful
Southern Europe	Male	Less or equal than 20 years	Basic knowledge / None knowledge	Civil society (user side)	Relevant + Useful	Essential	Essential	Relevant + Useful	Essential	Essential	Relevant + Useful	Relevant + Useful	Relevant + Useful
Southern Europe	Female	Less or equal than 20 years	Application of concepts out of professional practice	Public sector and authorities (client side)	Relevant + Useful	Relevant + Useful	Relevant + Useful	Relevant + Useful	Relevant + Useful	Relevant + Useful	Relevant + Useful	Relevant + Useful	Relevant + Useful
Southern Europe	Male	More than 20	Highly qualified and professional experience in the area	Business sector and providers (supply side)	Relevant + Useful	Relevant + Useful	Relevant + Useful	Relevant + Useful	Relevant + Useful	Relevant + Useful	Relevant + Useful	Relevant + Useful	Relevant + Useful
Southern Europe	Male	More than 20	Basic knowledge / None knowledge	Business sector and providers (supply side)	Relevant + Useful	Relevant + Useful	Relevant + Useful	Relevant + Useful	Relevant + Useful	Relevant + Useful	Relevant + Useful	Relevant + Useful	Relevant + Useful
Southern Europe	Male	More than 20	Highly qualified and professional experience in the area	Business sector and providers (supply side)	Relevant + Useful	Relevant + Useful	Relevant + Useful	Relevant + Useful	Relevant + Useful	Relevant + Useful	Relevant + Useful	Relevant + Useful	Relevant + Useful
Southern Europe	Female	Less or equal than 20 years	Highly qualified and professional experience in the area	Public sector and authorities (client side)	Essential	Essential	Essential	Essential	Essential	Essential	Essential	Essential	Essential
Southern Europe	Male	More than 20	Highly qualified and professional experience in the area	Public sector and authorities (client side)	Relevant + Useful	Relevant + Useful	Relevant + Useful	Relevant + Useful	Relevant + Useful	Relevant + Useful	Relevant + Useful	Relevant + Useful	Relevant + Useful
Central, Eastern, Western, Northern Europe	Male	Less or equal than 20 years	Basic knowledge / None knowledge	Civil society (user side)	Relevant + Useful	Essential	Essential	Essential	Essential	Essential	Relevant + Useful	Essential	Relevant + Useful
Southern Europe	Male	Less or equal than 20 years	Basic knowledge / None knowledge	Public sector and authorities (client side)	Relevant + Useful	Essential	Essential	Essential	Relevant + Useful	Essential	Relevant + Useful	Relevant + Useful	Relevant + Useful
Southern Europe	Male	More than 20	Highly qualified and professional experience in the area	Business sector and providers (supply side)	Relevant + Useful	Relevant + Useful	Essential	Essential	Relevant + Useful	Essential	Essential	Relevant + Useful	Relevant + Useful
Southern Europe	Male	More than 20	Highly qualified and professional experience in the area	Business sector and providers (supply side)	Relevant + Useful	Relevant + Useful	Relevant + Useful	Relevant + Useful	Relevant + Useful	Essential	Relevant + Useful	Relevant + Useful	Relevant + Useful
Southern Europe	Male	More than 20	Highly qualified and professional experience in the area	Public sector and authorities (client side)	Essential	Relevant + Useful	Relevant + Useful	Relevant + Useful	Relevant + Useful	Relevant + Useful	Relevant + Useful	Relevant + Useful	Relevant + Useful
Central, Eastern, Western, Northern Europe	Male	Less or equal than 20 years	Basic knowledge / None knowledge	Business sector and providers (supply side)	Essential	Essential	Relevant + Useful	Relevant + Useful	Essential	Relevant + Useful	Essential	Essential	Relevant + Useful
Southern Europe	Female	Less or equal than 20 years	Basic knowledge / None knowledge	Civil society (user side)	Relevant + Useful	Essential	Essential	Essential	Essential	Essential	Relevant + Useful	Essential	Essential
Southern Europe	Male	Less or equal than 20 years	Highly qualified and professional experience in the area	Business sector and providers (supply side)	Relevant + Useful	Essential	Relevant + Useful	Essential	Essential	Essential	Relevant + Useful	Relevant + Useful	Relevant + Useful
Southern Europe	Male	More than 20	Highly qualified and professional experience in the area	Business sector and providers (supply side)	Essential	Relevant + Useful	Relevant + Useful	Relevant + Useful	Relevant + Useful	Essential	Essential	Relevant + Useful	Relevant + Useful
Central, Eastern, Western, Northern Europe	Male	Less or equal than 20 years	Application of concepts out of professional practice	Civil society (user side)	Essential	Essential	Essential	Essential	Essential	Essential	Relevant + Useful	Relevant + Useful	Essential
Southern Europe	Male	More than 20	Highly qualified and professional experience in the area	Business sector and providers (supply side)	Relevant + Useful	Relevant + Useful	Relevant + Useful	Relevant + Useful	Relevant + Useful	Essential	Relevant + Useful	Essential	Relevant + Useful
Southern Europe	Male	Less or equal than 20 years	Application of concepts out of professional practice	Public sector and authorities (client side)	Essential	Relevant + Useful	Relevant + Useful	Relevant + Useful	Relevant + Useful	Relevant + Useful	Essential	Essential	Relevant + Useful
Central, Eastern, Western, Northern Europe	Male	More than 20	Application of concepts out of professional practice	Civil society (user side)	Relevant + Useful	Relevant + Useful	Relevant + Useful	Relevant + Useful	Essential	Essential	Relevant + Useful	Relevant + Useful	Relevant + Useful
Southern Europe	Male	Less or equal than 20 years	Highly qualified and professional experience in the area	Business sector and providers (supply side)	Relevant + Useful	Essential	Essential	Essential	Essential	Relevant + Useful	Relevant + Useful	Essential	Essential
Central, Eastern, Western, Northern Europe	Male	More than 20	Basic knowledge / None knowledge	Civil society (user side)	Relevant + Useful	Relevant + Useful	Essential	Relevant + Useful	Relevant + Useful	Relevant + Useful	Relevant + Useful	Relevant + Useful	Relevant + Useful
Central, Eastern, Western, Northern Europe	Male	More than 20	Highly qualified and professional experience in the area	Business sector and providers (supply side)	Essential	Relevant + Useful	Essential	Relevant + Useful	Essential	Essential	Relevant + Useful	Relevant + Useful	Essential
Southern Europe	Male	More than 20	Basic knowledge / None knowledge	Business sector and providers (supply side)	Essential	Essential	Relevant + Useful	Relevant + Useful	Relevant + Useful	Essential	Relevant + Useful	Relevant + Useful	Relevant + Useful
Southern Europe	Male	More than 20	Highly qualified and professional experience in the area	Business sector and providers (supply side)	Relevant + Useful	Relevant + Useful	Relevant + Useful	Relevant + Useful	Essential	Essential	Relevant + Useful	Relevant + Useful	Relevant + Useful
Southern Europe	Male	More than 20	Highly qualified and professional experience in the area	Civil society (user side)	Essential	Relevant + Useful	Relevant + Useful	Relevant + Useful	Essential	Essential	Relevant + Useful	Essential	Relevant + Useful
Southern Europe	Male	More than 20	Highly qualified and professional experience in the area	Business sector and providers (supply side)	Relevant + Useful	Essential	Essential	Essential	Relevant + Useful	Essential	Relevant + Useful	Relevant + Useful	Relevant + Useful
Southern Europe	Male	Less or equal than 20 years	Highly qualified and professional experience in the area	Business sector and providers (supply side)	Essential	Essential	Essential	Essential	Essential	Essential	Relevant + Useful	Essential	Relevant + Useful
Southern Europe	Female	Less or equal than 20 years	Basic knowledge / None knowledge	Civil society (user side)	Relevant + Useful	Essential	Essential	Relevant + Useful	Essential	Essential	Relevant + Useful	Relevant + Useful	Relevant + Useful
Southern Europe	Male	More than 20	Highly qualified and professional experience in the area	Business sector and providers (supply side)	Essential	Relevant + Useful	Relevant + Useful	Relevant + Useful	Relevant + Useful	Essential	Relevant + Useful	Relevant + Useful	Relevant + Useful
Southern Europe	Male	More than 20	Highly qualified and professional experience in the area	Business sector and providers (supply side)	Relevant + Useful	Essential	Essential	Essential	Relevant + Useful	Essential	Relevant + Useful	Relevant + Useful	Relevant + Useful
Central, Eastern, Western, Northern Europe	Female	Less or equal than 20 years	Highly qualified and professional experience in the area	Civil society (user side)	Relevant + Useful	Relevant + Useful	Relevant + Useful	Relevant + Useful	Relevant + Useful	Relevant + Useful	Relevant + Useful	Relevant + Useful	Relevant + Useful
Southern Europe	Male	More than 20	Highly qualified and professional experience in the area	Business sector and providers (supply side)	Relevant + Useful	Essential	Essential	Relevant + Useful	Essential	Essential	Relevant + Useful	Essential	Relevant + Useful
Southern Europe	Female	Less or equal than 20 years	Highly qualified and professional experience in the area	Public sector and authorities (client side)	Relevant + Useful	Relevant + Useful	Essential	Essential	Essential	Essential	Relevant + Useful	Relevant + Useful	Relevant + Useful
Central, Eastern, Western, Northern Europe	Male	Less or equal than 20 years	Highly qualified and professional experience in the area	Public sector and authorities (client side)	Relevant + Useful	Relevant + Useful	Relevant + Useful	Relevant + Useful	Relevant + Useful	Essential	Relevant + Useful	Relevant + Useful	Relevant + Useful
Southern Europe	Female	More than 20	Application of concepts out of professional practice	Public sector and authorities (client side)	Relevant + Useful	Relevant + Useful	Relevant + Useful	Relevant + Useful	Relevant + Useful	Relevant + Useful	Relevant + Useful	Relevant + Useful	Relevant + Useful
Southern Europe	Female	Less or equal than 20 years	Application of concepts out of professional practice	Civil society (user side)	Essential	Essential	Essential	Essential	Essential	Essential	Essential	Relevant + Useful	Relevant + Useful
Southern Europe	Female	More than 20	Basic knowledge / None knowledge	Public sector and authorities (client side)	Relevant + Useful	Relevant + Useful	Relevant + Useful	Relevant + Useful	Relevant + Useful	Relevant + Useful	Relevant + Useful	Relevant + Useful	Relevant + Useful
Southern Europe	Female	More than 20	Basic knowledge / None knowledge	Public sector and authorities (client side)	Relevant + Useful	Relevant + Useful	Relevant + Useful	Relevant + Useful	Relevant + Useful	Essential	Relevant + Useful	Relevant + Useful	Essential
Southern Europe	Male	Less or equal than 20 years	Basic knowledge / None knowledge	Public sector and authorities (client side)	Relevant + Useful	Relevant + Useful	Relevant + Useful	Essential	Essential	Relevant + Useful	Relevant + Useful	Essential	Relevant + Useful
Central, Eastern, Western, Northern Europe	Male	More than 20	Basic knowledge / None knowledge	Business sector and providers (supply side)	Essential	Essential	Essential	Essential	Essential	Essential	Relevant + Useful	Relevant + Useful	Relevant + Useful
Southern Europe	Female	More than 20	Basic knowledge / None knowledge	Civil society (user side)	Essential	Essential	Relevant + Useful	Relevant + Useful	Essential	Essential	Relevant + Useful	Relevant + Useful	Relevant + Useful
Central, Eastern, Western, Northern Europe	Male	Less or equal than 20 years	Basic knowledge / None knowledge	Civil society (user side)	Essential	Relevant + Useful	Relevant + Useful	Essential	Relevant + Useful	Relevant + Useful	Relevant + Useful	Relevant + Useful	Relevant + Useful
Southern Europe	Male	More than 20	Highly qualified and professional experience in the area	Public sector and authorities (client side)	Relevant + Useful	Relevant + Useful	Relevant + Useful	Essential	Relevant + Useful	Essential	Relevant + Useful	Relevant + Useful	Relevant + Useful
Southern Europe	Female	Less or equal than 20 years	Highly qualified and professional experience in the area	Civil society (user side)	Essential	Essential	Essential	Essential	Essential	Essential	Relevant + Useful	Essential	Essential
Southern Europe	Male	More than 20	Basic knowledge / None knowledge	Civil society (user side)	Essential	Essential	Essential	Essential	Relevant + Useful	Essential	Relevant + Useful	Relevant + Useful	Relevant + Useful
Southern Europe	Male	Less or equal than 20 years	Application of concepts out of professional practice	Public sector and authorities (client side)	Relevant + Useful	Relevant + Useful	Relevant + Useful	Relevant + Useful	Relevant + Useful	Relevant + Useful	Relevant + Useful	Relevant + Useful	Relevant + Useful
Southern Europe	Male	Less or equal than 20 years	Highly qualified and professional experience in the area	Business sector and providers (supply side)	Relevant + Useful	Essential	Relevant + Useful	Relevant + Useful	Essential	Essential	Relevant + Useful	Relevant + Useful	Relevant + Useful
Southern Europe	Male	Less or equal than 20 years	Application of concepts out of professional practice	Civil society (user side)	Relevant + Useful	Relevant + Useful	Relevant + Useful	Essential	Relevant + Useful	Essential	Relevant + Useful	Essential	Essential
Southern Europe	Male	More than 20	Application of concepts out of professional practice	Business sector and providers (supply side)	Essential	Essential	Essential	Essential	Essential	Essential	Essential	Relevant + Useful	Relevant + Useful
Southern Europe	Male	More than 20	Application of concepts out of professional practice	Civil society (user side)	Relevant + Useful	Relevant + Useful	Relevant + Useful	Relevant + Useful	Relevant + Useful	Relevant + Useful	Relevant + Useful	Relevant + Useful	Relevant + Useful
Southern Europe	Female	Less or equal than 20 years	Basic knowledge / None knowledge	Civil society (user side)	Relevant + Useful	Relevant + Useful	Relevant + Useful	Relevant + Useful	Relevant + Useful	Relevant + Useful	Relevant + Useful	Relevant + Useful	Relevant + Useful
Central, Eastern, Western, Northern Europe	Male	More than 20	Application of concepts out of professional practice	Business sector and providers (supply side)	Relevant + Useful	Relevant + Useful	Essential	Relevant + Useful	Relevant + Useful	Essential	Relevant + Useful	Essential	Essential
Central, Eastern, Western, Northern Europe	Male	Less or equal than 20 years	Application of concepts out of professional practice	Civil society (user side)	Relevant + Useful	Relevant + Useful	Essential	Relevant + Useful	Relevant + Useful	Essential	Essential	Relevant + Useful	Relevant + Useful
Central, Eastern, Western, Northern Europe	Male	Less or equal than 20 years	Basic knowledge / None knowledge	Business sector and providers (supply side)	Relevant + Useful	Relevant + Useful	Essential	Relevant + Useful	Essential	Essential	Relevant + Useful	Relevant + Useful	Relevant + Useful
Southern Europe	Male	Less or equal than 20 years	Application of concepts out of professional practice	Business sector and providers (supply side)	Essential	Essential	Essential	Relevant + Useful	Relevant + Useful	Essential	Relevant + Useful	Essential	Essential
Southern Europe	Male	Less or equal than 20 years	Application of concepts out of professional practice	Civil society (user side)	Relevant + Useful	Relevant + Useful	Essential	Relevant + Useful	Essential	Essential	Relevant + Useful	Essential	Essential
Southern Europe	Female	Less or equal than 20 years	Basic knowledge / None knowledge	Business sector and providers (supply side)	Essential	Essential	Essential	Essential	Essential	Essential	Relevant + Useful	Essential	Essential
Southern Europe	Male	More than 20	Basic knowledge / None knowledge	Civil society (user side)	Relevant + Useful	Essential	Essential	Relevant + Useful	Essential	Essential	Relevant + Useful	Essential	Relevant + Useful
Southern Europe	Female	Less or equal than 20 years	Application of concepts out of professional practice	Civil society (user side)	Relevant + Useful	Essential	Essential	Relevant + Useful	Essential	Essential	Relevant + Useful	Relevant + Useful	Essential
Southern Europe	Male	More than 20	Highly qualified and professional experience in the area	Business sector and providers (supply side)	Essential	Relevant + Useful	Relevant + Useful	Essential	Essential	Essential	Relevant + Useful	Essential	Relevant + Useful
Southern Europe	Female	Less or equal than 20 years	Highly qualified and professional experience in the area	Public sector and authorities (client side)	Relevant + Useful	Essential	Essential	Essential	Essential	Essential	Relevant + Useful	Relevant + Useful	Essential
Southern Europe	Male	Less or equal than 20 years	Application of concepts out of professional practice	Business sector and providers (supply side)	Relevant + Useful	Relevant + Useful	Essential	Essential	Relevant + Useful	Essential	Relevant + Useful	Relevant + Useful	Relevant + Useful
Southern Europe	Female	Less or equal than 20 years	Highly qualified and professional experience in the area	Business sector and providers (supply side)	Essential	Essential	Relevant + Useful	Essential	Essential	Essential	Relevant + Useful	Relevant + Useful	Relevant + Useful
Central, Eastern, Western, Northern Europe	Female	Less or equal than 20 years	Application of concepts out of professional practice	Civil society (user side)	Essential	Essential	Essential	Relevant + Useful	Essential	Essential	Relevant + Useful	Relevant + Useful	Relevant + Useful
Southern Europe	Male	Less or equal than 20 years	Highly qualified and professional experience in the area	Business sector and providers (supply side)	Essential	Essential	Essential	Essential	Essential	Essential	Relevant + Useful	Relevant + Useful	Relevant + Useful
Southern Europe	Male	Less or equal than 20 years	Highly qualified and professional experience in the area	Business sector and providers (supply side)	Relevant + Useful	Relevant + Useful	Relevant + Useful	Relevant + Useful	Relevant + Useful	Relevant + Useful	Relevant + Useful	Relevant + Useful	Relevant + Useful
Central, Eastern, Western, Northern Europe	Male	Less or equal than 20 years	Highly qualified and professional experience in the area	Business sector and providers (supply side)	Relevant + Useful	Relevant + Useful	Essential	Relevant + Useful	Essential	Essential	Relevant + Useful	Essential	Relevant + Useful
Central, Eastern, Western, Northern Europe	Male	More than 20	Basic knowledge / None knowledge	Civil society (user side)	Essential	Relevant + Useful	Relevant + Useful	Relevant + Useful	Relevant + Useful	Essential	Relevant + Useful	Relevant + Useful	Relevant + Useful
Southern Europe	Male	More than 20	Basic knowledge / None knowledge	Business sector and providers (supply side)	Relevant + Useful	Relevant + Useful	Relevant + Useful	Essential	Relevant + Useful	Relevant + Useful	Relevant + Useful	Essential	Relevant + Useful
